# Supplementary material for: A cascade of reactions involving anchimeric assistance leads to a highly 'crowded' hexa(alkylcarboxy)benzeneElectronic supplementary data (ESI) available: general methods, materials and X-ray data. See http://www.rsc.org/suppdata/cc/b1/b105569k/
Source: Royal Society of Chemistry journal article supplement (doi:10.1039/b105569k), 2001-11-08
Supplement: b105569k.doc [file b105569k.doc]

# Chemical Communications

**A cascade of reactions involving anchimeric assistance leads to a highly "crowded" hexa-(alkylcarboxy) benzene**

**____________________________________________________________________________________________________________________________________________**

## **Supplementary Material**

## **General Methods**.

## All reagents and solvents, which were of the highest purity available, were obtained from Aldrich. Column chromatography was carried out with silica gel 60 (7731, Merck). Nuclear magnetic resonance data were recorded on a Bruker AC250 (250 MHz) spectrometer with chemical shifts reported as ppm and CDCl3 serving as internal standard. Low and high resolution-mass spectra were measured on a Finnigan TSQ70 and a VG analytical ZAB2-E mass spectrometer, respectively.

# Materials

**Hexa(-1-adamantylcarboxy)methyl benzene, 2**. A solution of 1-adamantyl carboxylic acid (1.0 mmol), cesium carbonate (1.5 mmol), and hexabromomethyl benzene (1.0 mmol) in acetonitrile (30 mL) was stirred at reflux for 3 hours. The solvent was removed and to the remaining solid water (40 mL) was added. The mixture was extracted with methylene chloride (3 x 30 mL), the organic layer was washed subsequently with saturated sodium carbonate solution, water and brine (40 mL each), the organic layer was dried (MgSO4), and finally the solvent was revoved in vacuo. The remaining solid was purified by column chromatography (n-hexane-ethyl acetate 5 : 1, Rf = 0.70). 1H NMR (CDCl3): H = 5.32 (12 H, s, Ph-C*H2*), 1.95 (18 H, -C*H*), 1.82 (36 H, s, -C*H*2C-CO2R), 1.71 - 1.60 (36 H, m, C*H*2-CHR); 13C NMR (CDCl3): C = 176.94 (-*C*=O), 137.18 (Ph), 60.12 (Ph-*C*H*2*), 40.72, 38.67, 36.34 (adamantyl-*C*). CI+-MS (rel. abundance) m/z 1230 (9, M+), 1052 (100), 887 (2), 873 (2), 708 (6), 528 (2); HRMS found: 1229.7248; calculated for C78H102O12: 1229.7293.

**1-(1-adamantylcarboxylmethyl)-3,5-bisbromomethyl-2,4,6-ethyl benzene** (**4**) and **1,3-bis-(1-adamantylcarboxylmethyl)-5-bisbromomethyl-2,4,6-ethyl benzene** (**5**). **3** (1.0 mmol) was reacted with 1-adamantyl carboxylic acid (1.0 mmol) and cesium carbonate (1.5 mmol) and worked up in the same manner as described above. From the remaining oil **4** and **5**, as well as unreacted **3** were identified by mass spectroscopy. CI+-MS (rel. abundances) m/z 637 (1%, [M**5**+H]+), 559 (13), 537 (1, [M**4**+H]+), 459 (19), 441 (4, [M**3**+H]+), 361 (100), 341 (3), 317 (1), 297 (5). HRMS found: 537.0998; calculated for C26H35O2 Br2 ([**4**+H]+): 537.1004; HRMS found: 637.2885; calculated for C37H50O4 Br ([**5**+H]+): 637.2892.

**Bisbromomethylene-pentabromomethyl benzene** (major product) and **bis-(bisbromomethylene)-tetrabromomethyl benzene**, respectively,were identified as the main products together with unreacted **1** by mass spectroscopy when **1** was reacted with equimolar amounts of either cyclohexylcarboxylic acid (A) or *n-*propionic acid (B) under the same reaction conditions as described. In both cases the products precipitated as colourless solids, after the was removed and the solid residue was treated with water. The obtained crystals were washed with hot benzene.

(A): CI--MS (rel. abundances) m/z 795 (1%, [C12H12Br8-H]-), 715 (13, [C12H12Br7-H]-), 714 (100),

635 (2, C12H12Br6-H]-); HRMS found: 714.5144; calculated for C12H12Br7: 714.5161.

(B): CI--MS (rel. abundances) m/z 795 (1%, [C12H12Br8-H]-), 715 (12, [C12H12Br7-H]-), 714 (100),

635 (9, [C12H12Br6-H]-); HRMS found: 714.5153; calculated for C12H12Br7: 714.5161.

**X-ray data**

Crystallographic information in CIF format is accessible from file: 'supplem.cif '

View of **2** showing the atom labeling scheme. Thermal ellipsoids are scaled to the 30% probability level. Hydrogen atoms have been removed for clarity. The molecule lies on a crystallographic inversion center at ½ , ½ , ½ . The inversion center is located at the center of the aromatic ring.

Unit cell packing diagram for **2**. The view is approximately down the **b** axis. Molecules of **2** are shown in wireframe form while the solvate benzene molecules are displayed in ball-and-stick form. The benzene molecules lie in planes parallel to **ab** and are sandwiched between layers of **2**.
